# Supplementary material for: Novel CYP11A1-Derived Vitamin D and Lumisterol Biometabolites for the Management of COVID-19
Source: MDPI journal article supplement (doi:10.3390/nu14224779), 2022-11-11
Supplement: s1 [file s1]

**Figure S1** The change in the expression of *ACE2* and *TMPRSS2* in keratinocyte HaCaT cell line after treatment with listed vitamin D and lumisterol metabolites at  $2 \times 10^{-7}$  M [39].

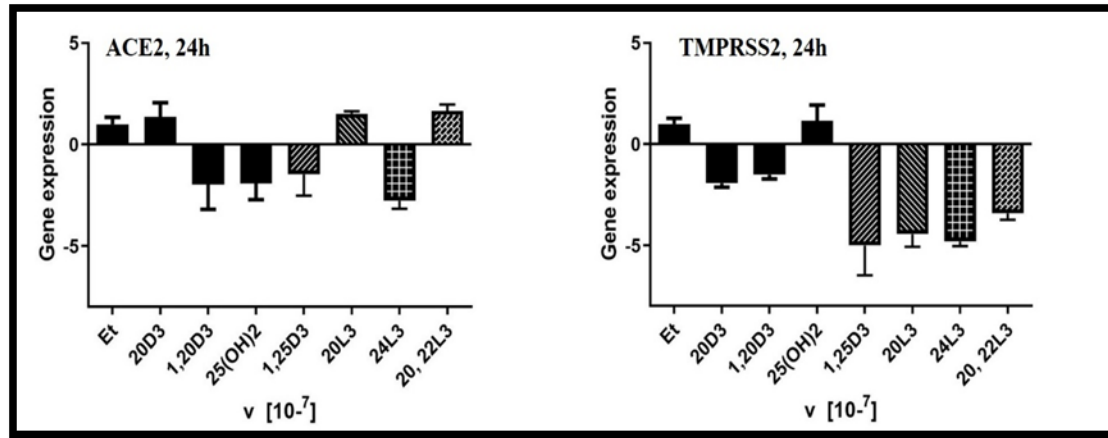

HaCaT keratinocytes were cultured in TPP tissue culture petri dishes ( $\varnothing 60\text{mm}$ ,  $22.1\text{cm}^2$ ) in DMEM containing 10% cFBS (charcoal FBS) to reach semiconfluency (60-80%) and then exposed to  $2 \times 10^{-7}$  M compounds or a corresponding concentration of ethanol solvent and were used for RNA isolation (RNAeasy Micro kit, Qiagen) after 24 h of incubation. RNA isolated from HaCaT cells was submitted for cDNA synthesis (High Capacity cDNA Reverse Transcription Kit with RNase Inhibitor, Applied Biosystems) following the manufacturers' protocols. RT-PCR was carried out using Cyber green, in triplicates. *Cyclophilin B* (*CIC-B*) was used as internal control. Primer sequences are listed as:

*ACE2*: (L: TCCAGTACTGTAGATGGTGC; R: CTCCTTCTCAGCCTTGTTCG),

*TMPRSS2*: (L: CCTCTTAACAATCCATGGCATTG ; R: GGGCAGACACACTGGTTTCA),

*CIC-B*: (L: TGTGGTGTGGCAAAGTTC; R: GTTTATCCCGGCTGTCTGTC).

Data was analyzed one way ANOVA using GraphPad Prism statistical software and inhibition of *ACE2* expression was significant ( $p < 0.05$ ) for 1,20(OH)2D3, 25(OH)D3, 1,25(OH)2D3 and 24(OH)L3, while *TMPRSS2* was significantly inhibited ( $p < 0.05$ ) by 20(OH)D3, 1,20(OH)2D3, 1,25(OH)2D3, 20(OH)L3, 24(OH)L3 and 20,23(OH)2L3.
